# Supplementary material for: Effects of ‘Healthy’ Fecal Microbiota Transplantation against the Deterioration of Depression in Fawn-Hooded Rats
Source: PubMed Central journal article supplement (PMC9239139; doi:10.1128/msystems.00218-22), 2022-04-28

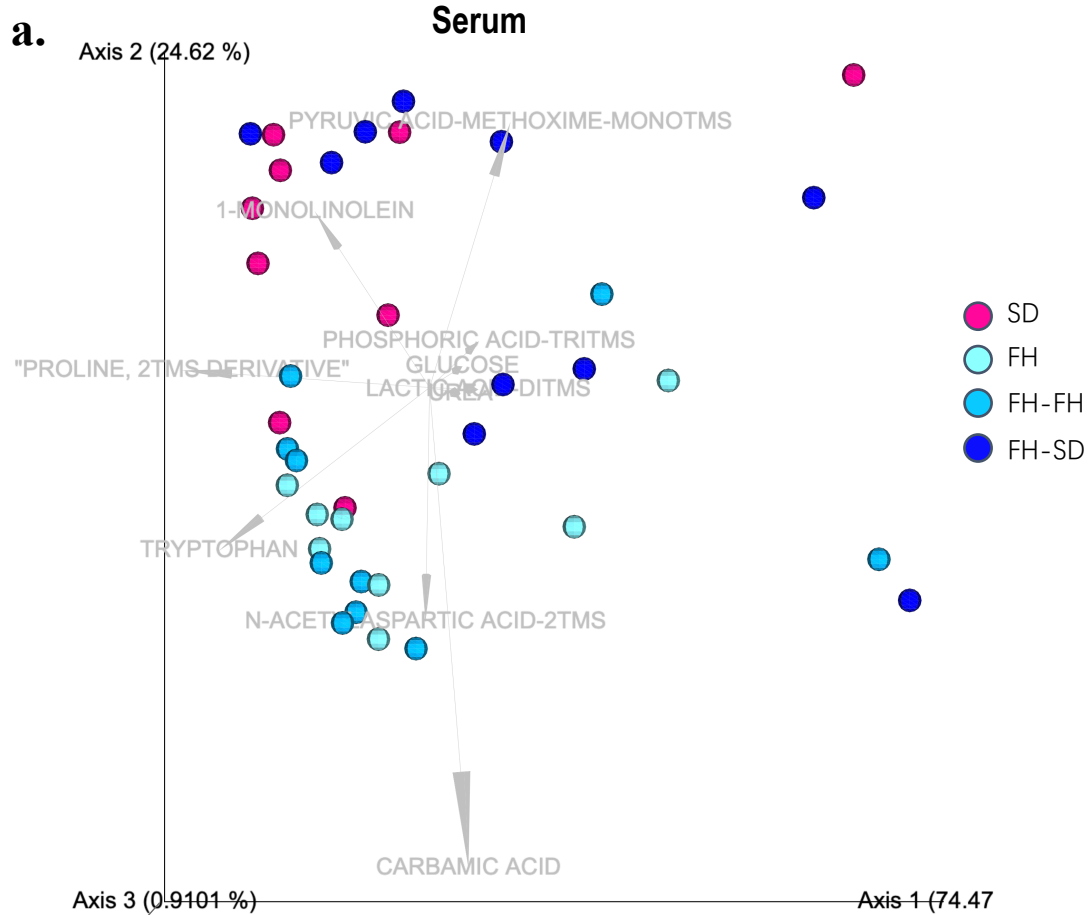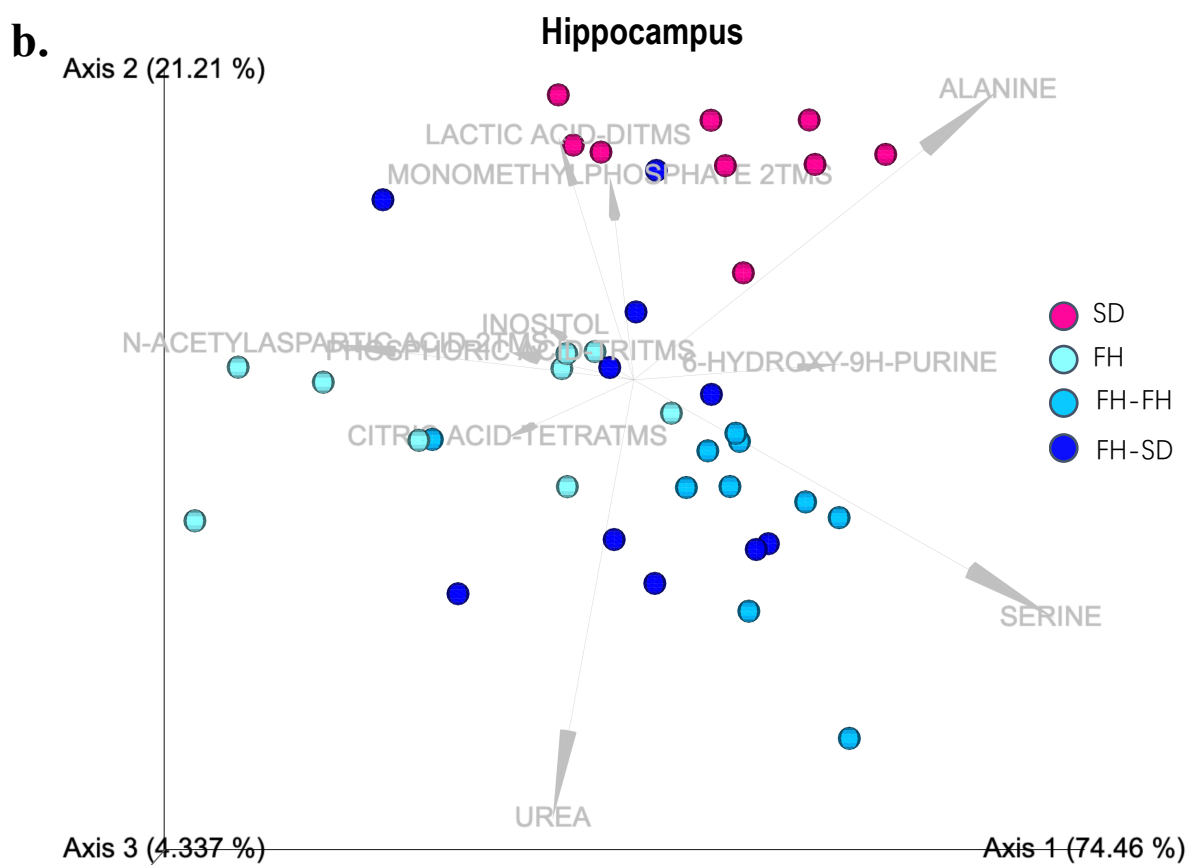

Supplement: msystems.00218-22-s0004.pdf [file msystems.00218-22-s0004.pdf]
